# Supplementary material
Source: PubMed Central journal article supplement (PMC4303772)
Supplement: supp_deu323_deu323supp_fig1.pdf [file supp_deu323_deu323supp_fig1.pdf]

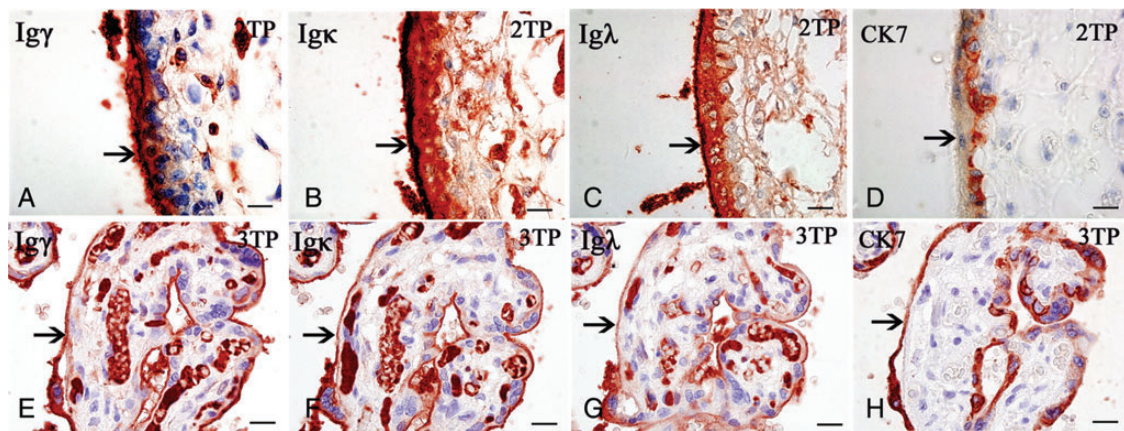

**Supplementary Figure S1** Co-localization of Ig $\gamma$ , Ig $\kappa$ , Ig $\lambda$  and CK7 in human trophoblasts of different trimesters. Serial sections show that Ig $\gamma$  (**A** and **E**), Ig $\kappa$  (**B** and **F**), Ig $\lambda$  (**C** and **G**) and CK7 (**D** and **H**) co-localize within the same trophoblast cells of placentas from the second (2TP) and third (3TP) trimester. In first trimester placentas, positive staining is detectable in the cytoplasm of both syncytiotrophoblasts (arrows) and cytotrophoblasts (as shown in Fig. 1 of the main text). In second trimester placentas, positive staining can be seen on the cell surface of syncytiotrophoblasts (arrows) and in the cytoplasm of both syncytiotrophoblasts and cytotrophoblasts. In third trimester placentas, positive immunoreactivity is located on the cell surface of syncytiotrophoblasts facing the intervillous space (arrows) and in the serum of the placental vasculature. Scale bar = 10 $\mu$ m.
