# Supplementary material
Source: PubMed Central journal article supplement (PMC4303772)
Supplement: supp_deu323_deu323supp_fig2.pdf [file supp_deu323_deu323supp_fig2.pdf]

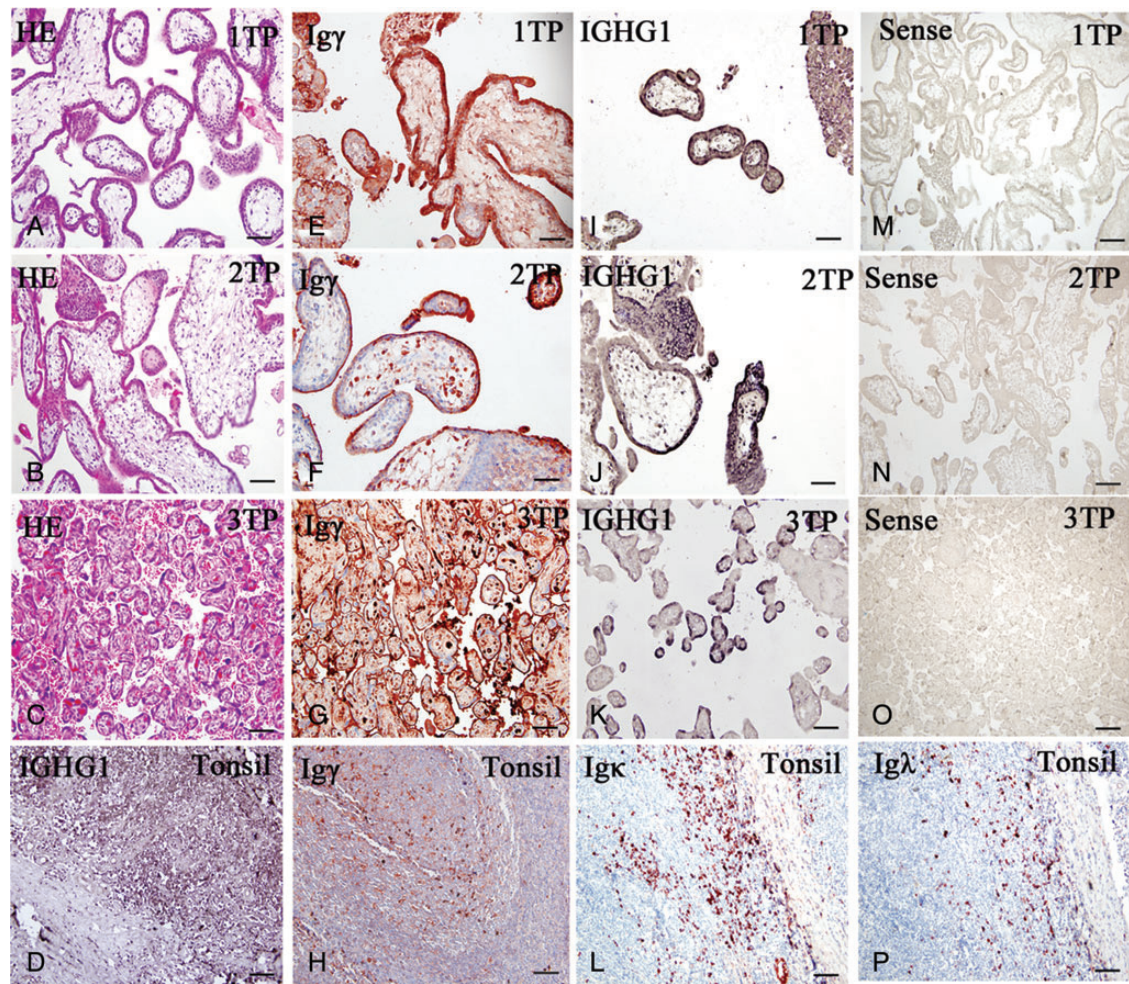

**Supplementary Figure S2** Expression of IgG proteins and mRNA transcripts in human placentas of different trimesters. **(A–C)** Hematoxylin and eosin (H&E) staining of the placenta shows no abnormality. **(E–G)** Positive Ig $\gamma$  IHC staining and **I–K**, positive ISH mRNA signals (with an IGHG1 anti-sense probe) can be seen in trophoblasts of placentas from all three trimesters (1TP, 2TP and 3TP represent the first, second and third trimester placenta respectively). **(M–O)** The specificity of ISH is confirmed by the absence of specific signal when using an IGHG1 sense probe as negative control. **(D, H, L and P)** Tissues of human tonsils. Positive ISH signals with an IGHG1 anti-sense probe (D) and positive Ig $\gamma$  (H), Ig $\kappa$  (L) and Ig $\lambda$  (P) IHC signals in B lymphocytes as positive controls. Scale bars, 50  $\mu$ m (A–L and P), 100  $\mu$ m (M–O).
