# Supplementary material
Source: PubMed Central journal article supplement (PMC4303772)
Supplement: supp_deu323_deu323supp_fig3.pdf [file supp_deu323_deu323supp_fig3.pdf]

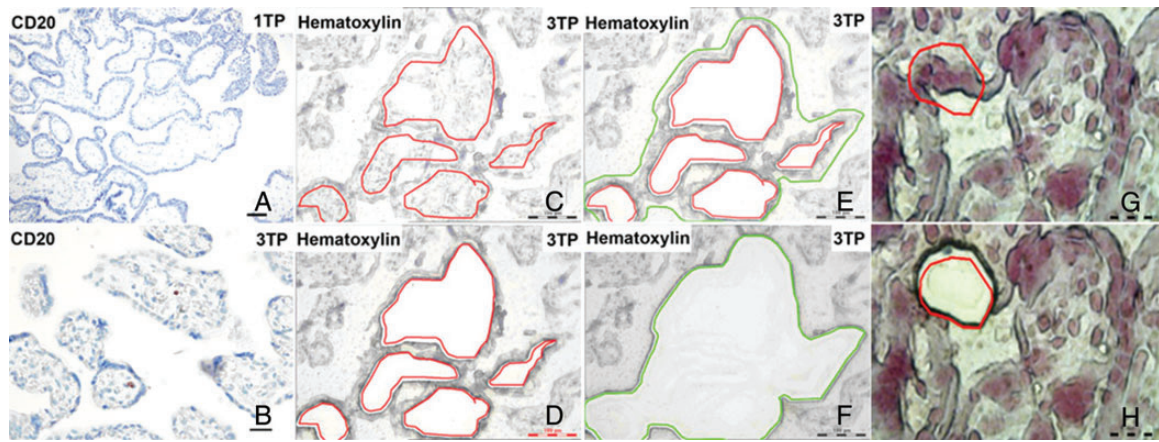

**Supplementary Figure S3** CD20 staining of B lymphocytes and laser-assisted microdissection of trophoblasts. **(A)** IHC with antibodies to identify B lymphocytes (CD20) shows no positive staining in first and second trimester (not shown) placentas (counterstained with hematoxylin). **(B)** In third trimester placentas, a limited number of CD20-positive cells (red color) were seen in the core of villi. **(C and D)** Following hematoxylin staining, the villus cores of term placentas were captured with laser-guided microdissection (LMD) and discarded before dissection (C) and after dissection (D). **(E and F)** The next layer of trophoblasts is collected for mRNA detection before dissection (E) and after dissection (F). **(G and H)** Capturing single cells using LMD before (G) and after (H) dissection. Scale bars, 50  $\mu\text{m}$  (A), 20  $\mu\text{m}$  (B), 100  $\mu\text{m}$  (C–F), 25  $\mu\text{m}$  (G–H).
