# Supplementary material
Source: PubMed Central journal article supplement (PMC4303772)
Supplement: supp_deu323_deu323supp_fig4.pdf [file supp_deu323_deu323supp_fig4.pdf]

### V region

```

<-----FWR1----->
clone1 1 GAGGTGCAGCTCGAGCAGTCAGGCCGAACCGTGACGGTGTAGCCTTCGGAGACCTG 57
IGHV4-61*08 1 C.....GC...G...G...C...GGAC.....A..... 54

----->
clone1 58 TCCCTCATCTGCTCTGTCTCTGGGGACTCCGTCAGT AGTGGCGGTACTACTGGAGC 114
IGH4-61*08 55 .....C.....A.....T..G.....C .....T..... 111

<-----FWR2----->
clone1 115 TGGCTCCGGCAGCCCCCAGGGAAGGGACTGGAGTGGATTGGC TATGTCTATAATAG 170
IGH4-61*08 112 .....A.....G .....A.....T..C..... 167

----->
clone1 171 TGCGAGCACCAATTACAATCCCTCCCTCAGGGGT CGAGTCACCATCTCAGAAGACAC 227
IGH4-61*08 168 ...G.....C.....A..A... .....A.....T..... 224

-----FWR3-----
clone1 228 GTCCAAGAACCAGTTCTCCTTGAATCTGAGTTCTGTGACCGCTGCGGACACGGCCGTA 285
IGH4-61*08 225 .....C.....G.....C.....G..... 282

----->
clone1 286 TATTTTGTGCGAGG 300
IGH4-61*08 283 .....AC..... 296
```

### N-D region

```

clone1 301 TATACCAGCAATG 313
IGHD6-13*01 4 .....G..... 13
```

### JH region

```

clone1 314 ACTGGTTCGACCCCTGGGGCCAGGGAACCCTGGTCACCGTCTCCTCA 360
IGHJ5*02 4 ..... 50
```

**Supplementary Figure S4** Analysis of the VH regions of IgY isolated from the placental trophoblasts.

### V region

<-----FWR1-----  
clone2 30 -----CGGTGACGGTGTCCC 44  
IGHV4-61\*08 1 CAGGTGCAGCTGCAGGAGTCGGGCCAGGACTGGTGAAGCCTT.....A.....CC..... 58

-----<-----CDR1----->-----  
clone2 45 TCATCTGCTCTGTCTCTGGGGACTCCGTCAGT AGTGGCGGTACTACTGGAGC TGG 100  
IGHV4-61\*08 59 .....C.....A.....T..G.....C .....T..... A... 114

-----FWR2-----<-----  
clone2 101 CTCCGGCAGCCCCAGGGAAGGGACTGGAGTGGATTGGC TATGTCTATAATAGTGCG 157  
IGHV4-61\*08 115 .....G .....A.....T.C.....G.. 171

-----CDR2----->-----  
clone2 158 AGCACCAATTACAATCCCTCCCTCAGGGGT CGAGTCACCATCTCAGAAGACACGTCC 214  
IGHV4-61\*08 172 .....C.....A..A.....A.....T..... 228

-----FWR3-----  
clone2 215 AAGAACCAGTTCTCCTTGAATCTGAGTTCTGTGACCGCTGCGGACACGGCCGTATATTT 273  
IGHV4-61\*08 229 .....C.....G.....C.....G.....A 287

----->  
clone2 274 TTGTGCGAAG 283  
IGHV4-61\*08 288 C..... 295

### N-D region

clone2 284 TATACCAGCAATG 296  
IGHD6-13\*01 4 .....G..... 13

### JH region

clone2 297 ACTGGTTCGACCCCTGGGGCCAGGGAACCCTGGTCACCGTCTCCTCA 343  
IGHJ5\*02 4 ..... 50

**V region**

```

<-----FWR1-----
clone3 35 -----CGGTGACGGTGTCCC 49
IGHV4-59*01 1 CAGGTGCAGCTGCAGGAGTCGGGCCAGGACTGGTGAAGCCTT.....A.....CC..... 58

-----><-----CDR1-----><-----
clone3 50 TCACCTGGAGTGTCTCAGGTGCTTCCATGAGC ----AGT----TACTTCTGGAAC TGG 99
IGHV4-59*01 59 .....C..C.....T.....GC.....C...T -----.....A.....G.. ..... 108

-----FWR2-----><-----
clone3 100 GTCCGGCAGTCCCCAGGGAAGGGACTGGAGTGGATTGGG TATATGTTTACACTGGG 156
IGHV4-59*01 109 A.....C..... .....C.A.....G..... 165

-----CDR2-----><-----
clone3 157 ATGAGCAACTTCAATCCCTCCCTCAAGAGC CGAGTCACCATATCATTAGACACGTCC 213
IGHV4-59*01 166 ..GC..C.....A.....C.....T .....G..... 222

-----FWR3-----
clone3 214 AAGAAGCAGTTCTCCCTGAAGTTGTATTCTATGACCGCTGCGGACACGGCCGTGTATT 271
IGHV4-59*01 223 .....C.....C...AGC...G..... 280

----->
clone3 272 ATTGTGCGGGG 282
IGHV4-59*01 281 ....C..... 288

N-D region
clone3 283 ATCCACATGGAGACATTTTGGTTAC 309
IGHD5-5*01 2 -----.....T.....GC..A..... 20

JH region
clone3 310 TTTGAAAGGTGGGGCCAGGGAACCCTGGTCACCGTCTCCTCA 351
IGHJ4*02 6 .....CTAC..... 47
```

**Supplementary Figure S4** Continued.
