# Supplementary material
Source: PubMed Central journal article supplement (PMC4303772)
Supplement: supp_deu323_deu323supp_fig5.pdf [file supp_deu323_deu323supp_fig5.pdf]

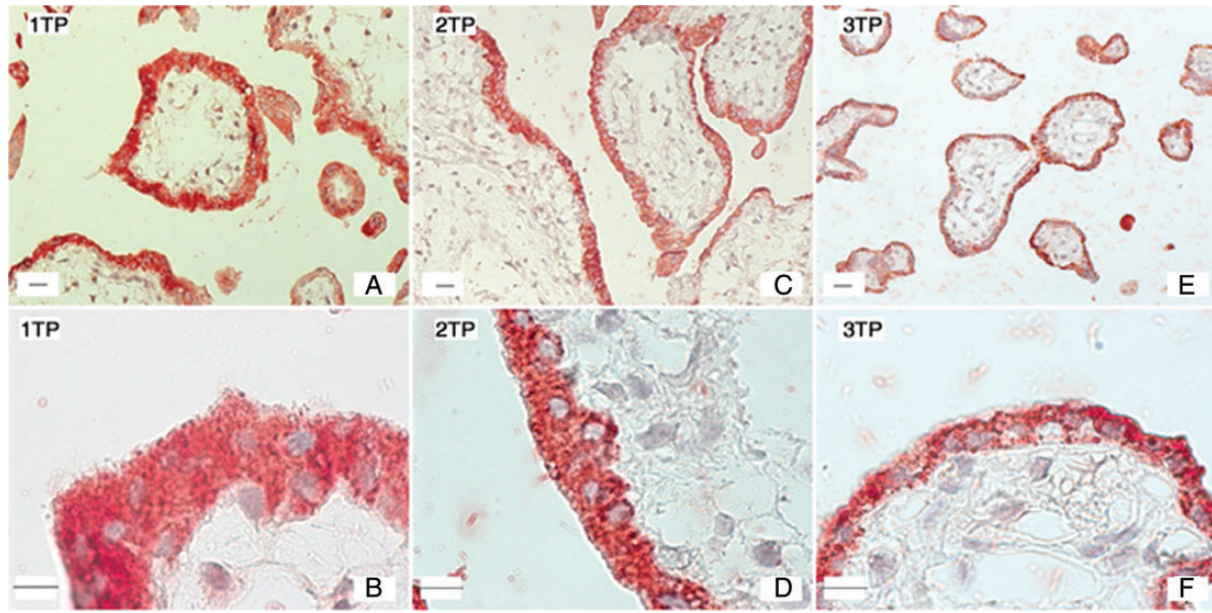

**Supplementary Figure S5** RAG2 expression in placenta. IHC with primary antibodies to RAG 2 shows strong immunoreactivity in the cytoplasm of both cytotrophoblasts and syncytiotrophoblasts of first trimester (**A** and **B**), second trimester (**C** and **D**) and third trimester (**E** and **F**) placentas. Scale bars, 20  $\mu\text{m}$  (A, C and E), 10  $\mu\text{m}$  (B, D and F).
