# Supplementary material
Source: PubMed Central journal article supplement (PMC4303772)
Supplement: supp_deu323_deu323supp_fig6.pdf [file supp_deu323_deu323supp_fig6.pdf]

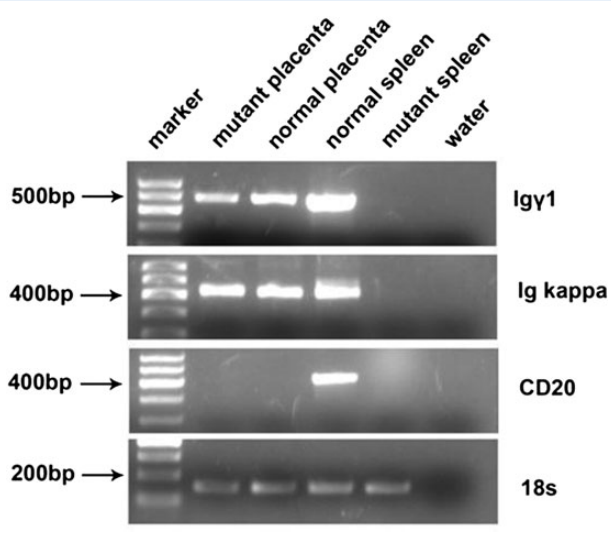

**Supplementary Figure S6** RT-PCR showing the expression of IgG in mouse placentas. Igγ1 and Igκ were detected in placentas of mutant mouse, placentas of normal ICR mouse and spleen of normal ICR mouse. The spleen of mutant mouse served as negative control. 18s served as internal control. CD20 was detected to exclude the contamination of B lymphocytes.
