# Supplementary material
Source: PubMed Central journal article supplement (PMC4303772)
Supplement: supp_deu323_deu323supp_fig7.pdf [file supp_deu323_deu323supp_fig7.pdf]

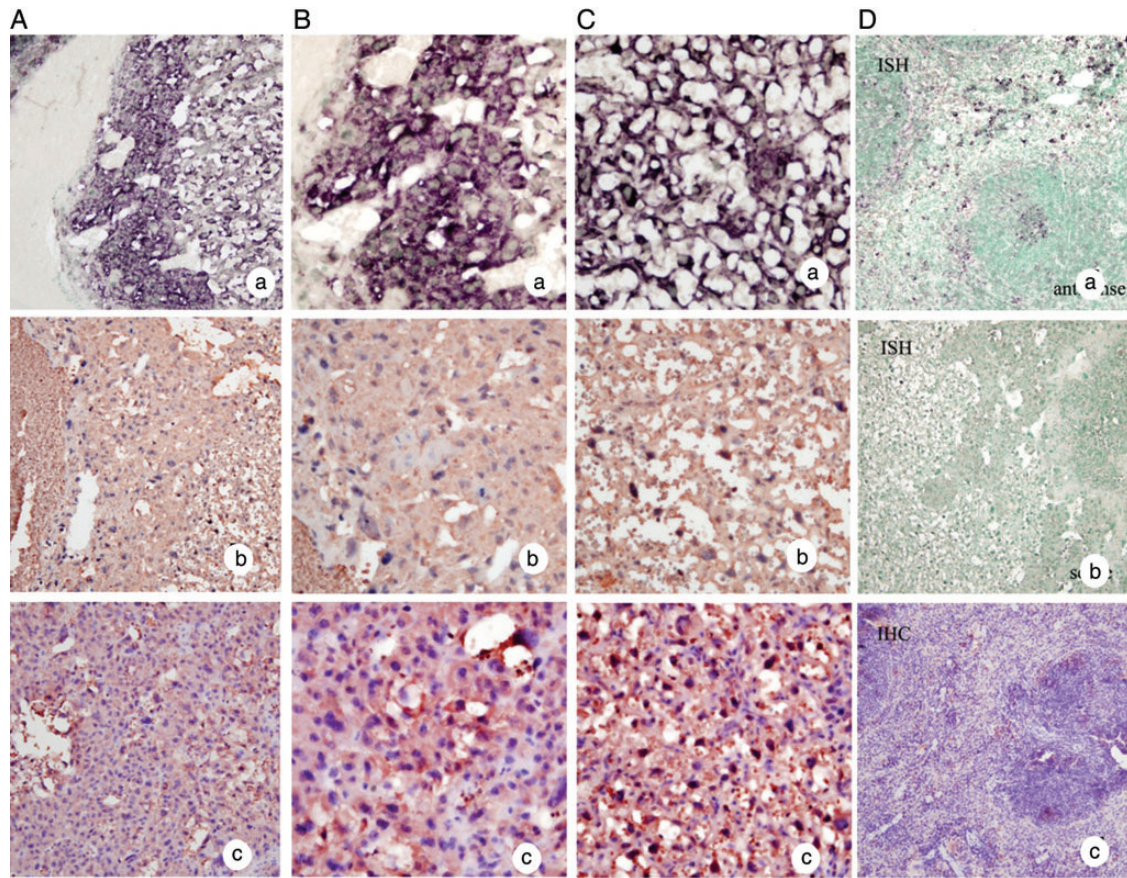

**Supplementary Figure S7** Molecular morphology evidence of IgG expression in mouse placentas. **(A)** IgG (whole molecular) and Ig $\gamma$  were detected in the placentas of mutant mouse. (a) ISH signals of Ig $\gamma$  were detected in the placentas of mutant mouse. (b) IHC signals of IgG (whole molecule) were detected in the placentas of mutant mouse. c, IHC signals of Ig $\gamma$  were detected in the placentas of mutant mouse. **(B)** IgG (whole molecule) and Ig $\gamma$  were detected in the spongiosotrophoblast layer of placentas of mutant mouse. (a) ISH signals of Ig $\gamma$  were detected in the cytoplasm of trophoblasts in spongiosotrophoblast layer of placentas of mutant mouse. (b) IHC signals of IgG (whole molecule) were detected in the cytoplasm of trophoblasts in spongiosotrophoblast layer of placentas of mutant mouse. c, IHC signals of Ig $\gamma$  were detected in the cytoplasm of trophoblasts in spongiosotrophoblast layer of placentas of mutant mouse. **(C)** IgG (whole molecule) and Ig $\gamma$  were detected in the labyrinth layer of placentas of mutant mouse. (a) ISH signals of Ig $\gamma$  were detected in the cytoplasm of trophoblasts in labyrinth layer of placentas of mutant mouse. (b) IHC signals of IgG (whole molecule) were detected in the cytoplasm of trophoblasts in labyrinth layer of placentas of mutant mouse. (c) IHC signals of Ig $\gamma$  were detected in the cytoplasm of trophoblasts in labyrinth layer of placentas of mutant mouse. **(D)** Controls of ISH and IHC. (a) Tissue sections of spleen of normal ICR mouse incubated with antisense probes of Ig $\gamma$  served as positive controls. (b) Tissue sections of placentas of mutant mouse incubated with sense probes of Ig $\gamma$  served as negative controls. (c) Tissue sections of spleen of normal ICR mouse incubated with antibodies against Ig $\gamma$  served as positive controls.
