# Supplementary material
Source: PubMed Central journal article supplement (PMC4303772)
Supplement: supp_deu323_deu323supp_fig8.pdf [file supp_deu323_deu323supp_fig8.pdf]

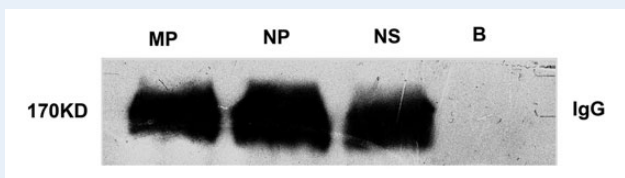

**Supplementary Figure S8** Western blot showing the expression of IgG in mouse placentas. Positive signals were detected in placentas of mutant mouse (MP) and placentas of normal ICR mouse (NP) at MW 170 000. Spleen of normal ICR mouse (NS) served as positive control. B (lysis buffer) served as negative control.
