# Supplementary material
Source: PubMed Central journal article supplement (PMC4303772)
Supplement: supp_deu323_deu323supp_fig9.pdf [file supp_deu323_deu323supp_fig9.pdf]

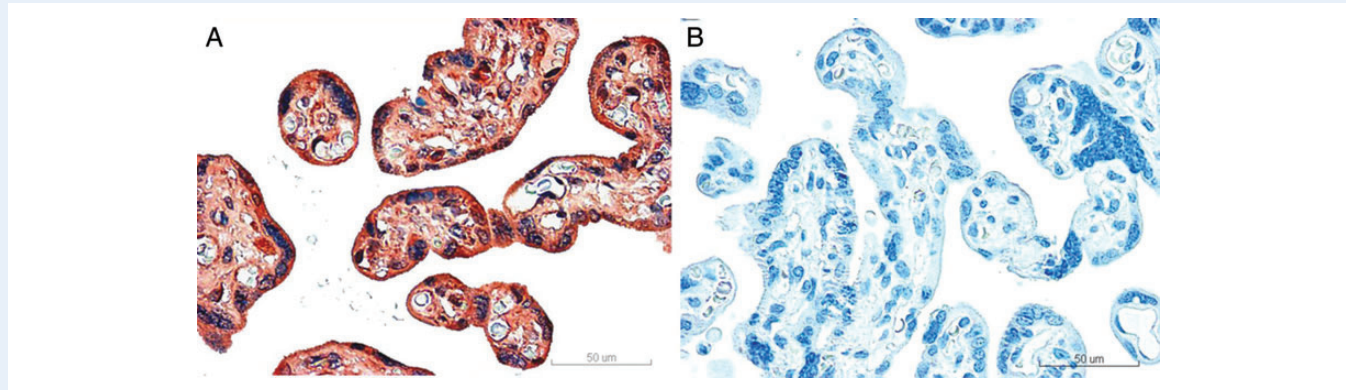

**Supplementary Figure S9** Staining of placentas with biotin-labeled Fab and biotin-labeled Fc fragments. **(A)** Extensive staining of placenta tissues when incubated with biotin-labeled Fab fragments of a IgG isolated from the maternal serum or the placenta. **(B)** No immunoreactivity was detected when the tissues were incubated with biotin-labeled Fc fragments of a IgG isolated from the maternal serum or the placenta. Scale bars, 50  $\mu\text{m}$ .
