# Supplementary material
Source: PubMed Central journal article supplement (PMC4303772)
Supplement: supp_deu323_deu323supp_fig10.pdf [file supp_deu323_deu323supp_fig10.pdf]

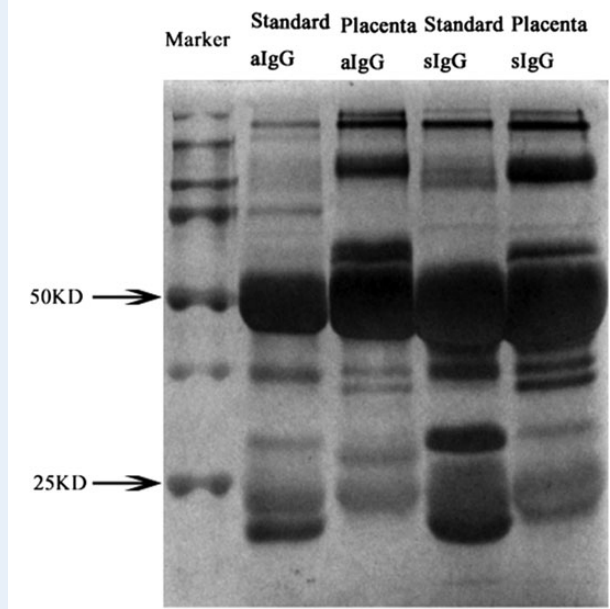

**Supplementary Figure S10** Silver staining of whole protein extracted from HeLa cells, run on an agarose gel and reacted with aIgG and sIgG extracted from human serum and human placenta. aIgG and sIgG reacted to the same panel of antigens with silver stain. aIgG, asymmetric IgG; sIgG, symmetric IgG; Standard, IgG isolated from human serum; Placenta, IgG isolated from human placenta.
