# Supplementary material
Source: PubMed Central journal article supplement (PMC4303772)
Supplement: supp_deu323_deu323supp_table1.pdf [file supp_deu323_deu323supp_table1.pdf]

**Supplementary Table S1 Detailed information of the antibodies used.**

| Primary antibody                        | Supplied by                                                  | Marker for           | Dilution or concentration                     | Incubation temperature | Incubation period |
|-----------------------------------------|--------------------------------------------------------------|----------------------|-----------------------------------------------|------------------------|-------------------|
| Goat anti-human IgG (IHC)               | Sigma, St Louis, MO, USA                                     | IgG (whole molecule) | 1:300 (IHC)                                   | 4°C                    | Overnight         |
| Rabbit anti-human Igγ (IHC, IEM, IF)    | Dako Carpinteria, CA, USA                                    | Igγ                  | 1:1000 (IHC), 1:300 (IEM), 1:500 (IF)         | 4°C                    | Overnight         |
| Mouse anti-human Igκ (IHC)              | Invitrogen, Zymed Laboratories, South San Francisco, CA, USA | Igκ                  | 1:100                                         | 4°C                    | Overnight         |
| Rabbit anti-human Igκ (IEM)             | Dako Glostrup, Denmark                                       | Igκ                  | 1:1000                                        | 4°C                    | Overnight         |
| Rabbit anti-human Igμ (IHC)             | ZSGB-BIO, Beijing, China                                     | Igμ                  | 1:300                                         | 4°C                    | Overnight         |
| Mouse anti-human CD20 (IHC, IF)         | Invitrogen, Zymed Laboratories, South San Francisco, CA      | B lymphocyte         | 1:100(IHC)/working solution ready to use (IF) | 4°C                    | Overnight         |
| Mouse anti-human CK7 (IHC)              | Invitrogen, Zymed Laboratories, South San Francisco, CA, USA | Trophoblast          | 1:100 (IHC)                                   | 4°C                    | Overnight         |
| RAG1 (IHC)                              | Santa Cruz Biotechnology, Inc., Santa Cruz, CA, USA          | RAG1                 | 1:50                                          | 4°C                    | Overnight         |
| RAG2 (IHC)                              | Protein Tech Group, Inc., Chicago, IL, USA                   | RAG2                 | 1:50                                          | 4°C                    | Overnight         |
| Mouse anti-human Igγ (PCC)              | Sigma, St Louis, MO, USA                                     | Igγ                  | 1:500                                         | 4°C                    | Overnight         |
| Goat anti-human FcRn (IEM)              | Santa Cruz Biotechnology, Inc., Santa Cruz, CA               | FcRn                 | 1:3                                           | 4°C                    | Overnight         |
| Mouse anti-human cytokeratin 7/17 (PCC) | Santa Cruz Biotechnology, Inc., Santa Cruz, CA               | Trophoblast          | 1:200                                         | 4°C                    | Overnight         |
| Mouse anti-human CD68 (PCC)             | ZSGB-BIO, Beijing, China                                     | Macrophage           | 1:100 (PCC)                                   | 4°C                    | Overnight         |
| Rabbit anti-human PLAP (PCC)            | ZSGB-BIO, Beijing, China                                     | Syncytiotrophoblast  | 1:50                                          | 4°C                    | Overnight         |
| Rabbit anti-human CD20 (PCC)            | ZSGB-BIO, Beijing, China                                     | B lymphocyte         | 1:100 (PCC)                                   | 4°C                    | Overnight         |
| Rabbit anti-human CD3 (IHC)             | ZSGB-BIO, Beijing, China                                     | T cells              | 1:100                                         | 4°C                    | Overnight         |
| Rabbit anti-human CD57 (IHC)            | ZSGB-BIO, Beijing, China                                     | NK cells             | 1:100                                         | 4°C                    | Overnight         |
