# Supplementary material
Source: PubMed Central journal article supplement (PMC4303772)
Supplement: supp_deu323_deu323supp_table2.pdf [file supp_deu323_deu323supp_table2.pdf]

**Supplementary Table SII RT-PCR primers**

| Gene name                   | Primer sequence 5'–3'                                                                                                                                                                                                                                     | Product size (base pairs) | located on different exons |
|-----------------------------|-----------------------------------------------------------------------------------------------------------------------------------------------------------------------------------------------------------------------------------------------------------|---------------------------|----------------------------|
| IGHG1                       | External ACGGCCGTGGAGGTGCATAATG (sense)<br>CGGGAGGCCGTGGTCTTGTAGTT (antisense)<br>Internal GACTGGCTGAATGGCAAGGAG (sense)<br>GGCGATGTCGCTGGGATAGAA (antisense)                                                                                             | 201                       | Yes                        |
| IGHG1 (used for cell lines) | External GTGTACACCCTGCCCCATCC (sense)<br>GAGGCTCTTCTGCGTGTAGTG (antisense)<br>Internal CCGGGATGAGCTGACCAAGAACC (sense)<br>CACGGAGCATGAGAAGACG (antisense)                                                                                                 | 282                       | Yes                        |
| VDJ <sub>H</sub>            | External V3, GAGGTGCAGCTCGAGCAGTCAGG (sense)<br>V4f, CAGGTGCAGCTGCTCGAGTCGGG (sense)<br>V6, CAGGTACAGCTCGAGCAGTCAGG (sense)<br>CHI, ACACCGTCACCGGTTCCGG (antisense)<br>Internal The same primers as external (sense)<br>LJH, TGAGGAGACGGTGACC (antisense) | 343–389                   | Yes                        |
| Igκ                         | TGAGCAAAGCAGACTACGAGA (sense)<br>GGGGTGAGGTGAAAGATGAG (antisense)                                                                                                                                                                                         | 231                       | No                         |
| Igλ                         | GAGCCTGACGCCTGAG (sense)<br>ATTGAGGGTTTATTGAGTGCAG (antisense)                                                                                                                                                                                            | 223                       | No                         |
| RAG1                        | External TGGATCTTTACCTGAAGATG (sense)<br>CTTGGCTTTCCAGAGAGTCC (antisense)<br>Internal CACAGCGTTTTGCTGAGCTC (sense)<br>AGCTTGCCTGAGGGTTCATG (antisense)                                                                                                    | 327                       | No                         |
| RAG2                        | External TGGAAGCAACATGGGAAATG (sense)<br>CATCATCTTCATTATAGGTGTC (antisense)<br>Internal TTCTTGGCATACCAGGAGAC (sense)<br>CTATTTGCTTCTGCACTG (antisense)                                                                                                    | 193                       | No                         |
| CD19                        | TACTATGGCACTGGCTGCTG (sense)<br>CACGTTCCCGTACTGGTTCT (antisense)                                                                                                                                                                                          | 218                       | Yes                        |
| I8s                         | AAACGGCTACCACATCCAAG (sense)<br>CCTCCAATGGATCCTCGTTA (antisense)                                                                                                                                                                                          | 155                       | No                         |
| CD34                        | CACCCTGTGTCTCAACATGG (sense)<br>GGCTTCAAGTTGTCTCTGG (antisense)                                                                                                                                                                                           | 191                       | Yes                        |
| CD38                        | TTGGGAACTCAGACCGTACC (sense)<br>GTTGCTGCAGTCCTTTCTCC (antisense)                                                                                                                                                                                          | 213                       | Yes                        |
| CD68                        | ACTGAACCCCAACAAAACCA (sense)<br>TTGTACTCCACCGCCATGTA (antisense)                                                                                                                                                                                          | 153                       | Yes                        |
| CK7                         | CAGGATGTGGTGGAGGACTT (sense)<br>TGAGGGTCCTGAGGAAGTTG (antisense)                                                                                                                                                                                          | 178                       | Yes                        |
| Actin                       | TAAAGACCTCTATGCCAACACAG (sense)<br>CACGATGGAGGGGCCGGACTCATC (antisense)                                                                                                                                                                                   | 218                       | Yes                        |
